## Shielding of Viruses such as SARS-CoV-2 from Ultraviolet Radiation in Particles Generated by Sneezing or Coughing: Numerical Simulations of Survival Fractions

Steven C. Hill<sup>a</sup>, David C. Doughty<sup>a</sup>, and Daniel W. Mackowski<sup>b</sup>  
DEVCOM Army Research Laboratory, 2800 Powder Mill Rd., Adelphi, Maryland, USA<sup>a</sup>;  
Auburn University, Auburn, Alabama, USA<sup>b</sup>

#Address correspondence to Steve Hill, [steven.c.hill32.civ@mail.mil](mailto:steven.c.hill32.civ@mail.mil)

### ABSTRACT

SARS-CoV-2 and other microbes within aerosol particles can be partially shielded from UV radiation. The particles refract and absorb light, and thereby reduce the UV intensity at various locations within the particle. Shielding has been demonstrated in calculations of UV intensities within spherical approximations of SARS-CoV-2 virions that are within spherical particles approximating dried-to-equilibrium respiratory fluids. The purpose of this paper is to calculate the survival fractions of virions (i.e., the fractions of virions that can infect cells) within spherical particles approximating dried respiratory fluids, and to investigate the implications of these calculations for using UV light for disinfection. The particles may be on a surface or in air. In this paper the survival fraction ( $S$ ) of a set of virions illuminated with a UV fluence ( $F$ , in  $J/m^2$ ) is approximated as  $S = \exp(-kF)$ , where  $k$  is the UV inactivation rate constant ( $m^2/J$ ). The average survival fractions ( $S_p$ ) of all the simulated virions in a particle are calculated using the calculated decreases in fluence. The results show that virions in particles of dried respiratory fluids can have significantly larger  $S_p$  than do individual virions. For individual virions, and virions in 1-, 5-, and 9- $\mu m$  particles illuminated (normal incidence) on a surface with 260-nm UV light, the  $S_p = 0.00005$ , 0.0155, 0.22 and 0.28, respectively, when  $kF=10$ . The  $S_p$  decrease to  $<10^{-7}$ ,  $<10^{-7}$ , 0.077 and 0.15, respectively, for  $kF=100$ . Calculated results also show that illuminating particles with UV beams from widely separated directions can strongly reduce the  $S_p$ . These results suggest that the size distributions and optical properties of the dried particles of virion-containing respiratory fluids are likely important in effectively designing and using UV germicidal irradiation systems for microbes in particles. The results suggest the use of reflective surfaces to increase the angles of illumination and decrease the  $S_p$ . The results suggest the need for measurements of the  $S_p$  of SARS-CoV-2 in particles having compositions and sizes relevant to the modes of disease transmission.

## INTRODUCTION

Some diseases caused by viruses and bacteria can be transmitted by sneezed or coughed aerosols, droplets (of any size), or by particles remaining after droplets of respiratory or other fluids have dried-to-equilibrium (termed “dried particles” here) (Lu et al., 2020; Miller et al., 2020; Huang et al., 2021). SARS-CoV-2 is found in fluids of the nasopharynx (Landry et al., 2020; Yilmaz et al., 2021), nose (Pere et al., 2020), throat (Zou et al., 2020), and lung (Wolfel et al., 2020), and in saliva (Azzi et al., 2020; Wyllie et al., 2020) and sputum (Pan et al., 2020). These fluids may be aerosolized by coughing, sneezing, talking or breathing. Microbes in particles on surfaces may be transferred to humans by direct contact, via fomites, or may be reaerosolized (Fisher et al., 2012; Kesavan et al., 2017; Krauter et al., 2017; Paton et al., 2015; Qian et al., 2014). An approach to reducing transmission of the associated diseases is to reduce the exposure of persons to viable microbes in the air and/or on surfaces (Cheng et al., 2020). There is a need for improved designs of buildings and vehicles, and the airflows within them, to reduce the transmission of airborne diseases while allowing human interactions to the extent possible (Morawska et al., 2020; Augenbraun et al., 2020). There is a need for decontamination of masks and filters (Fischer et al., 2020; Woo et al., 2012), and surfaces in many locations. UV germicidal irradiation (UVGI) appears to be useful in addressing these needs (Rutala and Weber, 2019; Lindsley et al., 2018; Morawska et al., 2020; Kowalski, 2009). Here, following Kowalski (2009), both 260- and 302-nm light are included in UVGI.

A problem with using UVGI to inactivate microbes is that in certain cases viruses and bacteria can be partially shielded from UVGI by being within or on particles (Osman et al., 2008; Kesavan et al., 2014; Handler and Edmonds, 2015; Doughty et al., 2021) or by clumping of particles (Coohill and Sagripanti, 2008). Numerical simulations of spherical dried droplets of respiratory fluids containing spherical 100-nm virions to simulate SARS-CoV-2 showed that virions in dried particles of respiratory fluids can be partially protected from UV radiation (Doughty et al., 2021). That study showed that partial shielding from UV occurs in particles whether they are on a surface or not. In these model results the electromagnetic field equations (Maxwell’s equations) were solved exactly (within numerical error) using the Multi-Sphere T-Matrix (MSTM) method (Mackowski, 2008; Mackowski and Mishchenko, 2011, 2013).

In such simulations, virions can be protected both by absorption of UVGI within the particle and by refraction at the air-particle surface. In these simulations the extent of shielding is affected by the wavelength of the UV light and the properties of the dried droplet containing the virion. The degree of shielding increases as the size of the particle containing the virions increases. Illumination from multiple incident beams, from widely separated directions, tends to decrease the shielding from UVGI. Illumination of a particle uniformly from all directions can reduce the shielding. Such all-direction illumination may occur for a particle in turbulent air illuminated for a sufficient time to tumble and spin through all orientations relative to the incident beam(s). The key parameter calculated was the  $R_i$ , which is the ratio of the UV intensity in the  $i^{\text{th}}$  virion in a particle to the intensity in an individual virion, illuminated either in air or on the same surface.

In modeling and designing systems and procedures for minimizing disease transmission, the survival fraction is typically a more useful quantity than  $R_i$ . The simplest common expression for survival fraction ( $S$ ) is

$$S = \exp(-kF), \quad (1)$$

where  $k$  is the UV rate constant for inactivation ( $\text{m}^2/\text{J}$ );  $F$  is the fluence ( $\text{J}/\text{m}^2$ ) (also termed the dose). Also,  $F=It$ , where  $I$  is the intensity of the irradiance ( $\text{W}/\text{m}^2$ ), and  $t$  is the time of

illumination. The value of  $S$  depends on several factors including the UV-intensity at each virion, UV wavelength, time of illumination, humidity, temperature, material in which the virions are embedded (if any), and surface on which the virions rest (if any). For a given virus and set of experimental conditions the  $S$  is measured for different  $F$ , and then  $k$  is determined using Eq. 1. The  $k$  have been measured for coronaviruses (Hessling et al., 2020), including SARS-CoV-2 (Heilingloh et al., 2020; Ratnesar-Shumate et al., 2020), and other viruses (Sagripanti and Lytle, 2011; Schuit et al., 2020), bacteria and fungi (Kowalski, 2009). More complex expressions of the survival fraction, such as those which incorporate an additional term or terms to account for shoulders, long tails or other features in survival curves (Kowalski 2009, Ch. 3; Kowalski et al., 2019) are beyond the scope of this paper.

Here the average survival fractions are calculated for virions of SARS-CoV-2 (approximated as 100-nm spherical particles) within otherwise homogeneous spherical particles having optical properties to approximate dried particles of sneezed or coughed respiratory fluids. The particles, incident beams, wavelengths and surfaces are as in Doughty et al. (2021): three sizes (1-, 5- and 9- $\mu\text{m}$ ), two UV wavelengths (260 and 302 nm), and several combinations of incident beams and directions. Also, the particles are on a surface or in air. The goal of this work is to quantify the increases in survival of virions in model particles that result from the particle's partial shielding of some of the virions from UVGI. Once users of germicidal- or solar-UVGI are aware of the potential for increases in survival fractions of virions in particles, they may be better able to mitigate the effects of such shielding.

## METHODS

The methods of calculating the UV intensities and estimating the optical properties of the virions and dried respiratory fluids were described in Doughty et al. (2021). If a UV planewave propagates in a material with complex refractive index  $m_r + i m_i$ , the intensity of the irradiance of the wave at position ( $z$ ) is  $I(z) = I_o \exp(-z/\delta)$ . Here,  $I_o$  is  $I$  at  $z=0$ ,  $\delta$  is the penetration depth, and the imaginary part of the complex refractive index is  $m_i = \lambda/4\pi\delta$ , where  $\lambda$  is the UV wavelength. The UV intensities in the spherical particles were obtained by solving exactly (within numerical error) the electromagnetic (EM) field equations for a number of homogeneous spheres, either separate or included within other spheres. There may be a planar surface near the sphere(s). No sphere surfaces can intersect. The solution, obtained using the Multi-Sphere T-Matrix (MSTM) method (Mackowski, 2008; Mackowski and Mishchenko, 2011, 2013), expands the fields within each sphere as a sum of vector spherical harmonics (VSH) with unknown coefficients and within the material of the surface using an angular spectrum of planewaves. The coefficients of the VSH and plane waves are obtained by enforcing the boundary conditions at each interface. The virions were approximated as homogenous 100-nm diameter spheres with optical properties chosen to approximate SARS-CoV-2 virions. The enclosing spheres have optical properties selected to approximate dried respiratory fluids as described in Doughty et al., (2021). For illumination with a plane wave having an intensity of irradiance  $I_o$ , the net rate of energy absorption by the  $i^{\text{th}}$  virion is  $I_o \pi a_i^2 Q_{\text{abs},i}$ , where  $a_i$  is the radius and  $Q_{\text{abs},i}$  is the absorption efficiency, each for the  $i^{\text{th}}$  virion. The relative rate of absorption of UV energy of the  $i^{\text{th}}$  virion is  $R_i = Q_{\text{abs},i} / Q_{\text{abs},\text{single}}$ , where  $Q_{\text{abs},\text{single}}$  is the absorption efficiency of a virion resting on the surface. The  $R_i$  can range over several orders of magnitude in absorbing particles with dimensions of several wavelengths. In such cases, large numbers of  $R_i$  are needed to adequately simulate the distribution. For 9- $\mu\text{m}$  particles, 120 simulations of 100 virions/particle were calculated and combined to approximate the  $R_i$  distribution for randomly positioned virions.

The survival fraction for the  $i^{\text{th}}$  virion in a particle is then

$$S_i = \exp(-kFR_i). \quad (2)$$

The average of the survival fractions ( $S_i$ ) of all the modeled virions in the particle is  $S_p$ , the key parameter illustrated in the figures.

## RESULTS

### *Average Survival Fractions are Larger in Larger Particles*

Figure 1 shows  $S_p$  (average of the  $S_i$  in Eq. 2) as a function of  $kF$  for virions within 1-, 5- and 9- $\mu\text{m}$  diameter particles, and for individual virions (particle size = virion size = 0.1  $\mu\text{m}$ ) as in Eq. 1. In Fig. 1 the  $S_p$  increases with particle size for both wavelengths used (260 and 302 nm). For each of the curves in Fig. 1 (and in Figs. 2 to 4), the Table gives the  $S_p$  at  $kF = 1, 10, 100, 1000$  and 10,000. In the figures and the Table, the  $S_p$  is shown as a function of the dimensionless parameter  $kF$ : for a relevant combination of  $k$  and  $F$ , the  $S_p$  can be estimated for particles of the sizes and complex refractive indexes used here. As seen in Fig. 1 and the Table, when  $\lambda=260$  nm and  $kF=10$  the  $S_p$  is: 0.000045 for the 0.1- $\mu\text{m}$  diameter individual virion, 0.015 for the 1- $\mu\text{m}$  particles, 0.217 for 5- $\mu\text{m}$  particles, and 0.28 for the 9- $\mu\text{m}$  particles. When  $\lambda=260$  nm and  $kF=100$  the  $S_p$  is:  $< 0.0000005$  for the 1- $\mu\text{m}$  particles, 0.077 for the 5- $\mu\text{m}$  particles, and 0.149 for the 9- $\mu\text{m}$  particles. The curves in Figs. 1-4 are not simple exponentials (except for the individual-virion curves) because they are averages of many simple exponentials. For the  $i^{\text{th}}$  exponential curve,  $S_i = 1/e$  when  $kF = 1/R_i$ . As  $kF$  increases, the  $S_i$  of the virions with the largest  $R_i$  decrease faster than do the  $S_i$  of virions with smaller  $R_i$ . Consequently, the relative contributions of the different virions to the  $S_p$  vs  $kF$  curve changes with  $kF$ . For large  $kF$  the virions with the smallest  $R_i$  dominate the  $S_p$ .

### *Average Survival Fractions vs $kF$ are Larger in Particles with Higher Absorptivity*

For a given  $kF$  in Fig. 1, the  $S_p$  are smaller when  $\lambda=302$  nm than when  $\lambda=260$  nm, because at 302 nm the particles are less absorbing of UVGI and the  $\delta$  are larger. For example, when  $kF=10$ , the  $S_p$  for 1- $\mu\text{m}$  particles are 0.0156 at 260 nm, but 0.00377 at 302 nm. Also when  $kF=10$ , the  $S_p$  for 5- $\mu\text{m}$  particles are 0.217 at 260 nm but 0.164 at 302 nm. However, the  $k$  at 302 nm tend to be many times smaller than at 260 nm, and so a higher  $F$  ( $\text{J}/\text{m}^2$ ) is required to achieve the same  $kF$ .

Figure 2 illustrates how the  $S_p$  vs  $kF$  curves vary with the absorption of UV light by the material of the dried droplet. The curves are labeled by the  $\delta$ . The  $m_i$  are in the caption and Table 1. In Fig. 2 the  $m_i$  were chosen to span a wider range than the estimated “typical” values used in the other figures. In Fig. 2, at 260 nm, in addition to the  $\delta = 2.8$  and 10  $\mu\text{m}$  in Fig. 1, there is also a more strongly absorbing particle with  $\delta = 1.4$   $\mu\text{m}$  ( $m_i = 0.01456$ ). At 302 nm, there is also a more weakly absorbing particle with  $\delta = 59.9$   $\mu\text{m}$  ( $m_i = 0.00040$ ). This larger range of  $\delta$  is used to better account for the large variations in some of the primary light-absorbing components of saliva or nasal fluids, such as, at 260 nm, nucleic acids (e.g., Poehls et al., 2018), and at 302 nm, uric acid (Hawkins et al., 1963; Riis et al., 2018, Fig. 2).

In Fig. 2, the  $S_p$  of even the least absorbing particle is many times greater than that of the individual virion. For example, even when the  $\delta$  is 6.7 particle diameters (i.e., the 9- $\mu\text{m}$  particle at 302 nm with  $\delta = 59.9$   $\mu\text{m}$ ), when  $kF = 10$ , the  $S_p$  for the virions in the particle (0.188) is 4200 times greater than the  $S_p$  of the individual virion (0.000045). Because the estimated absorption is

so low, the increase in  $S_p$  occurs primarily because of refractive shielding. For solar wavelengths longer than the 302-nm UVGI used here, the absorption tends to be even lower, with larger  $\delta$ . However, because of refractive shielding the large increase in  $S_p$  remains (as compared to that of the individual virions).

### ***Average Survival Fractions are Reduced with UV light from Multiple Directions***

Figures 3 and 4 illustrate how illumination with beams from multiple angles can result in reductions in  $S_p$ . The notation for angles follows that used in the MSTM codes (Mackowski, 2008). A line perpendicular to the surface and passing through the center of the particle and then through the planar surface defines the z-axis. The zenith angle ( $\beta$ ) is the angle from this axis. When there is more than one illumination beam with  $\beta \neq 0^\circ$ , the azimuthal angles ( $\alpha$ ) angles between these beams are also given. In Fig. 3, when  $kF = 10$ , the  $S_p$  in the 9- $\mu\text{m}$  particles range from 0.0876 with five widely separated UV beams, to 0.282 with one UV beam at normal incidence. For the individual virion,  $S_p = 0.000045$ . When  $kF = 100$ , the  $S_p$  range from 0.00128 with five widely separated UV beams to 0.149 with one UV beam with  $\beta = 0^\circ$ .

In Fig. 3 the curves can be grouped into three main categories: a) Illumination with one beam only, with  $\beta = 0^\circ, 40^\circ$  or  $80^\circ$ . b) Illumination with multiple beams, but the differences in illumination angles are less than  $90^\circ$ . c) Illumination with multiple beams where at least one of the angular differences between two of the angles of incidence is greater than  $90^\circ$ .

With only one illumination beam the differences in  $S_p$  distributions are relatively small, but not negligible. The set of beams providing the lowest  $S_p$  includes five beams: one beam heading perpendicular to the surface ( $\beta=0^\circ$ ), and four beams, each with  $\beta = 80^\circ$  from the vertical but approaching from different azimuthal angles,  $\alpha=0^\circ, 90^\circ, 180^\circ, 270^\circ$ . At  $kF=100$ , the  $S_p = 0.00128$  for this set. A set of four beams with  $\beta = 80^\circ$  and  $\alpha=0^\circ, 90^\circ, 180^\circ$ , or  $270^\circ$ , (similar to the five-beam case but with no  $\beta = 0^\circ$  beam), has  $S_p = 0.00331$ .

Highly UV-reflective surfaces (Ryan et al., 2010; Rutala et al., 2013; Krishnamoorthy et al., 2016; Lindsley et al., 2018) can increase overall UVGI and can help in directing UVGI into shaded regions of a room. The results in Fig. 3 suggest an additional benefit of highly UV-reflective surfaces, i.e., helping to achieve illumination with multiple beams where the angular differences between the angles of incidence with respect to the surface is relatively large (see Doughty et al., (2021) for the  $R_i$  distributions).

In Figs. 3 and 4 the UV illumination energy is split between the beams so that the total intensity in each of the cases in Fig. 3 can be directly compared. Potential increases in the overall UV-illumination intensity that could result from generating additional beams using reflective surfaces could very likely decrease the  $S_p$ . However, such calculations depend upon factors such as the positions, angles and reflectivities of the relevant surfaces, and are beyond the scope of this paper.

Figure 4 shows the orientation-averaged  $S_p$  vs  $kF$  for virions in 5- and 9- $\mu\text{m}$  particles (dashed lines). Such orientation averaged results might be obtained with a fixed-orientation particle illuminated equally from all directions or with a particle that rotates (tumbles and spins) through all orientations with respect to one or more UV beams.

In Fig. 4 (see also the numbers in the Table) the reductions in  $S_p$  with orientation averaging are remarkable. For  $kF > 9$ , the all-orientations case has a lower  $S_p$  than any of the other cases with 9- $\mu\text{m}$ . For 9- $\mu\text{m}$  particles when  $kF = 100$ , the  $S_p$  is less than  $5 \times 10^{-7}$  for the orientation-averaged case, but is 0.00128 for the five beam case, and 0.149 for the single beam  $\beta = 0^\circ$  case. For 5- $\mu\text{m}$  particles when  $kF = 100$ , the  $S_p$  is less than  $5 \times 10^{-7}$  for orientation-averaged case, and is 0.0768 for the single beam with  $\beta = 0^\circ$ .



Also in Fig. 4, when  $kF > 11$  the  $S_p$  for the orientation-averaged 5- $\mu\text{m}$  particles is less than the  $S_p$  for 1- $\mu\text{m}$  particles ( $\beta = 0^\circ$ ). When  $kF > 33$ , the  $S_p$  for the orientation-averaged 9- $\mu\text{m}$  particles is less than  $S_p$  for 1- $\mu\text{m}$  particles ( $\beta = 0^\circ$ ). Such results may appear confusing. How can orientation averaging be so important compared to a 9-fold difference in diameter when the smaller particle is only 1- $\mu\text{m}$  diameter? The reason is that in the orientation-averaged particle there are no virions that are refractively shielded well. But the wavelength is so short (260 nm), that even a 1- $\mu\text{m}$  particle illuminated from one direction can have 100-nm regions that are significantly refractively shielded (e.g., Hill et al., 2015, Fig. 7a).

## DISCUSSION

### Virions in Particles Tend to have Larger Survival Fractions for a set UV Dose

Virions within UV-illuminated particles tend to have larger  $S_p$  than do individual virions, as seen in calculations for spherical particles which are homogeneous except for the virions. Several key relations can be seen in the calculated results.

- For particles on a surface with a given  $m_r + i m_i$ , illuminated with normally incident UVGI (zenith angle  $\beta=0$ ) at a given wavelength, as the particle size increases the  $S_p$  increases (except for possibly at some of the lowest UV fluences) (Fig. 1). This relation occurs for both wavelengths studied (260 and 302 nm). To achieve  $S_p = 0.001$  in 1- $\mu\text{m}$  particles with 260 nm light,  $kF$  must be approximately 4 $\times$  higher for 1- $\mu\text{m}$  particles, 230 $\times$  higher for the 5- $\mu\text{m}$  particles and 2000 $\times$  greater for the 9- $\mu\text{m}$  particles, all with respect to the individual virion. At 302 nm, the increases in  $kF$  required are smaller: 2 $\times$ , 56 $\times$  and 300 $\times$ , respectively, because the absorption of UV by the particle is smaller.
- For particles on a surface illuminated with normally incident UVGI ( $\beta = 0$ ), as the penetration depth in the particles decreases the  $S_p$  increases. This relation is most clear in Fig. 2, but also seen in Fig. 1.
- UV Illumination of particles from multiple directions, especially widely varying directions, can reduce the  $S_p$ . Particles illuminated equally from all directions tend to have especially low  $S_p$  (Fig. 4). All-orientation  $S_p$  may be approximated by particles that tumble and spin for a sufficient time as they are carried within turbulent airflows through UVGI. Small particles in outdoor air on a gusty and sunny day may be examples of particles illuminated from all directions.

### Complications

#### *Compositions of Coughed or Sneezed Airway Fluids are Complex and Variable*

The compositions of airway fluids may vary with a person's genetic makeup, disease state (if any), time since last drink or meal, degree of hydration, exertion level, region of the respiratory tract, and other factors. In the estimates of  $m_i$  from airway-fluid compositions used here, the molecules absorbing the most UVGI at 260-nm are DNA, RNA and nucleosides/nucleotides. In using calculated  $S_p$  to improve the use of UVGI in reducing the transmission of disease, a sense of the ranges of measured concentrations of UV-absorbing molecules such as nucleic acids can be beneficial. Konečná et al. (2020) reported average dsDNA concentrations in whole saliva of 0.24 g/l in healthy subjects and 0.5 g/L in persons with periodontitis. However, in the supernatants from centrifuged (1600 $\times$  g) samples they measured average concentrations of DNA of 0.054 g/l in healthy subjects and 0.07 g/l in persons with periodontitis. Fahy et al (1995) measured a range of cell-free DNA concentrations from 0.06 to 5.8 g/L (average 0.5 g/L) in patients with asthma. Pandit et al. (2013) found the extracellular RNA in the saliva (supernatant after centrifugation) ranged from 0.17 to 0.76 g/l in healthy control subjects and from 0.09 to 0.36 g/l in cancer patients. SARS-CoV-2 and other microbes can induce neutrophils in saliva to

release DNA, histones and proteins to form Neutrophil Extracellular Traps (NETs) (Lachowicz-Scroggins et al., 2019; Arcanjo et al., 2020). Eosinophil Extracellular Traps (EETs) and Basophile Extracellular Traps (BETs) also contain DNA and contribute to airway defense and inflammation (Yousefi et al., 2020). Bacterial and viral DNA and RNA (Haro et al., 2020) also occur in airway fluids, but typically in lower concentrations than host DNA and RNA. To partially account for the large variability in DNA and RNA concentrations, a large range of  $m_i$  are used in the calculations here.

### *More Information is Needed on Morphologies of Dried Particles of Respiratory Fluids*

In this paper the model particles are spherical and homogeneous (except for the virions), and the positions of virions within each particle are random. The MSTM can be used to model UVGI in more-complex particles than those investigated here, e.g., particles with additional spherical regions inside and outside the particle, each with its own  $m_r$  and  $m_i$ . However, such modeling requires measurements or assumptions of the geometries of the particles and  $m_r$  and  $m_i$  of each of the various regions. The homogeneous-sphere-with-virions assumption is a useful case to investigate first, given the large numbers of relevant variables:  $m_r$  and  $m_i$  of the virion(s), particle and surface; size(s) of the virions and the particles; virion locations; wavelengths; number and angles of beams; presence of a surface or not. However, for more accurate modeling of the  $S_p$  of more complex particles, additional studies along the lines of studies by Vejerano and Marr (2017) and by Walker et al., (2021) would likely be needed.

Vejerano and Marr (2017) collected droplets of artificial saliva on a superhydrophobic surface and used optical microscopy to examine the particles as they dried as the RH was lowered. In their figures, particles that were less than roughly 20  $\mu\text{m}$  appear to us as approximately spherical, but inhomogeneous. The nonsphericities appear to arise from the crystallization/precipitation of different materials in different locations. Walker et al., (2021, their figure 5c) collected dried particles of artificial saliva on a surface and examined them with scanning electron microscopy. The particles generally look smooth on the order of the apparent resolution, except for some unclear features. Walker et al. (2021) also state that light scattering patterns indicate that the particles are inhomogeneous. These are the only studies (to the authors' knowledge) with as much information related to morphologies of small particles from dried saliva or respiratory fluids with sizes in the range of interest (e.g., Fennelly, 2020). However, there are uncertainties in how to apply the observations of Vejerano and Marr, (2017) and Walker et al. (2021) to modeling of  $S_p$  of dried saliva or respiratory particles in the 0.5- to 9- $\mu\text{m}$  size range.

One reason for the uncertainty is that the artificial saliva particles studied by Vejerano and Marr, (2017) and Walker et al. (2021) are mostly > 20  $\mu\text{m}$ . In contrast, the particles emphasized here are 0.1- to 9- $\mu\text{m}$ ; larger particles are significant on a per-mass basis (Jarvis, 2020), but tend to deposit relatively quickly from air. As droplets of respiratory fluid dry, some solutes may crystallize into different regions, resulting in inhomogeneous and possibly nonspherical particles. As water evaporates from the surface, concentration gradients form within the drying droplets and the droplets become more viscous. The distributions and gradients of solutes depend on the diffusion coefficients of the solutes, and the temperature- and humidity-dependent rates of evaporation. A given concentration difference requires a higher concentration gradient in a 1- $\mu\text{m}$  particle than in a 20- $\mu\text{m}$  particle.

Another reason for uncertainty in applying the measured results is that respiratory fluids tend to be more complex than the artificial fluids used in the studies mentioned. Differences between human and model saliva, and between gastric and submaxillary mucin, are not insignificant

(Sarkar et al., 2019). Because of the additional complexity of actual saliva and other respiratory fluids (containing DNA, RNA, multiple mucins and other proteins, carbohydrates, etc.), there is cause to wonder if crystallization/precipitation may be more likely to occur as smaller crystals in dried coughed/sneezed droplets, as compared with fewer larger crystals in the artificial salivas. Vejerano and Marr (2017) used an aqueous solution of gastric mucin, NaCl, and a phospholipid surfactant. Walker et al. (2020), following (Woo et al., 2012), used an aqueous solution of  $\text{Na}^+$ ,  $\text{K}^+$ ,  $\text{Mg}^{2+}$ ,  $\text{Ca}^{2+}$ ,  $\text{Cl}^-$ ,  $\text{HCO}_3^-$ ,  $\text{H}_2\text{PO}_4^-$ ,  $\text{SCN}^-$ , amylase, mucin from porcine stomach, and a 1-to-1000 dilution of Dulbecco's modified minimal essential medium, which adds very small concentrations of glucose, amino acids, vitamins, cofactors, and sulfate. Neither includes nucleic acids. Large molecules such as DNA and RNA, not included in the artificial saliva, may affect the diffusion rates of various solutes (Dix and Verkman, 2008) or particles (Linssen et al., 2021) as they respond to the concentration gradients generated by the evaporation of water from the surface of the droplet/particle.

## CONCLUSIONS

Average survival fractions ( $S_p$ ) of virions in particles of dried respiratory fluids exposed to UVGI can be much larger than survival fractions of virions not within such particles, as illustrated in Figs. 1-4. The  $S_p$  were calculated using UV intensities within virions calculated with the MSTM, an exact method (within numerical error). The model particles are spherical and homogeneous, except for the virions. The particles may be on a surface and may be illuminated with any number of incident beams.

The key findings are:

- a) The  $S_p$  increases as the particle size increases, where the smallest relevant particle is an individual virion (Figs. 1 and 4).
- b) The  $S_p$  increases as the UV-absorptivity of the material comprising the particle increases (Figs. 1 and 2). However, even when the material of the particle absorbs very little UV light, the  $S_p$  increases as the particle size increases.
- c) The  $S_p$  tends to decrease as more UV beams, from more widely separated directions, illuminate the particle, where the total UV energy is the same for each case (Figs. 3 and 4). In the limiting case of equal illumination from all angles, the  $S_p$  tend to be especially low (Fig. 4). This case is equivalent to the one where particles rotate (spin and tumble) through all orientations with respect to the illumination beams during their time of exposure to UVGI.
- d) Increases in  $S_p$  for virions in particles can be mitigated by using more intense UVGI sources, and/or more UVGI sources, and/or with highly UV-reflective surfaces (Ryan et al., 2010; Rutala et al., 2013; Lindsley et al., 2018). An advantage of using highly UV-reflective surfaces is that in addition to increasing the UV intensity, they can also be positioned to increase the numbers of directions from which particles are illuminated, and the angular separation between the various angles of illumination.

Detailed, accurate modeling of the  $S_p$  of virions in particles requires knowledge of the morphologies of the virion-containing particles, i.e., the 3-D shapes, positions, and compositions or optical properties of each region of the particle.

## RECOMMENDATIONS

In designing, testing and using UVGI systems to inactivate viruses, recognize that virions within particles larger than a very few UV wavelengths tend to have larger survival fractions than do individual virions, and that the survival fractions increase with particle size.



In evaluating UVGI systems for efficacy of inactivation, test for inactivation with virion-containing particles having sizes and compositions representative of the particles that need to be inactivated. For example, if tests were done only with virion-containing particles smaller than 1  $\mu\text{m}$ , but the system may be used with a significant fraction of particles as large as 4 to 5  $\mu\text{m}$ , then recognize that the results shown here suggest that the measured survival fractions will very likely be higher for the 4- to 5- $\mu\text{m}$  particles.

In designing and deploying UVGI systems for virions in particles sufficiently large- and/or absorptive to shield virions, consider, to the extent possible, systems that illuminate particles from many, widely separated, angles (see Figs. 3 and 4). Consider employing systems with surfaces that are highly reflective at the relevant UV wavelengths, because such surfaces can increase both the UV intensities and the ranges of angles of incidence of the UV illumination, and thereby decrease the survival fractions. For systems in which particles of all the relevant sizes spin and tumble through all orientations as they are being illuminated, the need for illumination from many directions, including reflected beams, is not necessary.

## REFERENCES

- Anderson, DJ, Moehring, RW, Weber, DJ, Lewis, SS, Chen, LF, Schwab, JC, Becherer, P, Blocker, M, Triplett, PF, Knelson, LP, Lokhnygina, Y, Rutala, WA, Sexton, DJ and CDC Prevention Epicenters Program. 2018. Effectiveness of targeted enhanced terminal room disinfection on hospital-wide acquisition and infection with multidrug-resistant organisms and *Clostridium difficile*: a secondary analysis of a multicentre cluster randomized controlled trial with crossover design (BETR Disinfection). *Lancet Infect. Dis.* 18(8): 845-853. DOI: 10.1016/S1473-3099(18)30278-0.
- Arcanjo, A, Logullo, J, Barreto Menezes, CC, Chrispim de Souza Carvalho Giangiarulo, T, Carneiro dos Reis, M, Menezes Migliani de Castro, G, da Silva Fontes, Y, Regina Todeschini, A, Freire-de-Lima, L, Decoté-Ricardo, D, Ferreira-Pereira, A, Freire-de-Lima, CG, Coutinho Barroso, SP, Takiya, C, Conceição-Silva, F, Savino, W and Morrot, A. 2020. The emerging role of neutrophil extracellular traps in severe acute respiratory syndrome coronavirus 2 (COVID-19). *Sci. Rep.* 10:19630. DOI: 10.1038/s41598-020-76781-0.
- Augenbraun, BL, Lasner, ZD, Mitra, D, Prabhu, S, Raval, S, Sawaoka, H, and Doyle, JM. 2020. Assessment and mitigation of aerosol airborne SARS-CoV-2 transmission in laboratory and office environments. *J. Occup. Environ. Hyg.* 17(10), 447–456. DOI: 10.1080/15459624.2020.1805117.
- Azzi, L, Carcano, G, Gianfagna, F, Grossi, P, Dalla Gasperina, D, Genoni, A, Fasano, M, Sessa, F, Tettamanti, L, Carinci, F, Maurino, V, Rossi, A, Tagliabue, A, and Baj, A. 2020. Saliva is a reliable tool to detect SARS-CoV-2. *J. Infect.* 81:e45-e50. DOI: 10.1016/j.jinf.2020.04.005.
- Cheng, VC-C, Wong, S-C, Chuang, VW-M, So, SY-C, Chen, JH-K, Sridhar S, To, KK-W, Chan, JF-W, Hung, IF-N, Ho, P-L, Yuen, K-Y. 2020. The role of community-wide wearing of face mask for control of coronavirus disease 2019 (COVID-19) epidemic due to SARS-CoV-2. *J. Infect.* 81:107–114. DOI: 10.1016/j.jinf.2020.04.024.

Coohill, TP and Sagripanti, J-L. 2008. Overview of the inactivation by 254 nm ultraviolet radiation of bacteria with particular relevance to biodefense. *Photochem. Photobiol.* 88:1084-1090. DOI: 10.1111/j.1751-1097.2008.00387.x

Dix, JA, and Verkman, AS. 2008. Crowding effects on diffusion in solutions and cells. *Ann. Rev. Biophys.* 37:247-263. DOI: 10.1146/annurev.biophys.37.032807.125824.

Doughty, DC, Hill, SC, and Mackowski, DW. 2021. Viruses such as SARS-CoV-2 can be partially shielded from UV radiation when in particles generated by sneezing or coughing: Numerical simulations. *J. Quant. Spectrosc. Radiat. Transf.* [262](#):107489 DOI: 10.1016/j.jqsrt.2020.107489.

Fahy, JV, Kim, KW, Liu, J, Boushey, HA. 1995. Prominent neutrophilic inflammation in sputum from subjects with asthma exacerbation. *J. Allergy Clin. Immunol.* 95(4):843-852. DOI: 10.1016/s0091-6749(95)70128-1.

Fennelly, KP. 2020. Particle sizes of infectious aerosols: implications for infection control. *Lancet Respir. Med.* 8:914-24. DOI: 10.1016/S2213-2600(20)30323-4

Fisher, EM, Richardson, AW, Harpest, SD, Horacre, KC, and Shaffer, RE. 2012. Reaerosolization of MS2 bacteriophage from an N95 filtering facepiece respirator by simulated coughing. *Ann. Occup. Hyg.* 56(3):315-325. DOI: 10.1093/annhyg/mer101.

Fischer, RJ, Morris, DH, van Doremalen, N, Sarchette, S, Matson, MJ, Bushmaker, T, Yinda, CK, Seifert, SN, Gamble, A, Williamson, BN, Judson, SD, de Wit, E, Lloyd-Smith, JO, Munster, VJ. 2020. Effectiveness of N95 Respirator Decontamination and Reuse against SARS-CoV-2 Virus. *Emerg Infect Dis.* 26(7):1628–163. DOI: 10.3201/eid2609.201524.

Handler, FA and Edmonds, JM. 2015. Quantitative analysis of effects of UV exposure and spore cluster size on deposition and inhalation hazards of *Bacillus* spores. *Aerosol Sci. Tech.* 49:1121-1130. DOI: 10.1080/02786826.2015.1102857.

Haro, K, Ogawa, M, Saito, M, Kusuhara, K, and Fukuda, K. 2020. Bacterial composition of nasal discharge in children based on highly accurate 16S rRNA gene sequencing analysis. *Sci. Rep.* 10:20193. DOI: 10.1038/s41598-020-77271-z.

Hawkins, GR, Zipkin, I, and Marshall, LM. 1963. Determination of Uric Acid, Tyrosine, Tryptophan, and Protein in Whole Human Parotid Saliva by Ultraviolet Absorption Spectrophotometry. *J. Dent. Res.* 42(4):1015-1022. DOI: 10.1177/00220345630420040301.

Hessling, M, Hones, K, Vatter, P and Lingenfelder, C. 2020. Ultraviolet irradiation doses for coronavirus inactivation – review and analysis of coronavirus photoinactivation studies. *GMS Hyg. Infect. Control.* 15:Doc08. DOI: 10.3205/dgkh000343.

Hielingloh, CS, Aufderhorst, UW, Schipper, L, Dittmer, U, Witzke, O, Yang, D, Zheng, X, Sutter, K, Trilling, M, Alt, M, Steinmann, E and Krawczyk. 2020. Susceptibility of SARS-CoV-2 to UV irradiation. *Am. J. Infect. Control.* 48:1273-1275. DOI: 10.1016/j.ajic.2020.07.031.

Hill, SC, Williamson, CC, Doughty, DC, Pan, Y-L, Santarpia, JL, Hill, HH. 2015. Size-dependent fluorescence of bioaerosols: Mathematical model using fluorescing and absorbing molecules in bacteria. *J. Quant. Spectrosc. Radiat. Transf.* 157:54-70. DOI: 10.1016/j.jqsrt.2015.01.011.

Kesavan, J S, Humphreys, PD, Bottiger, JR, Valdes, ER, Rastogi, VK, and Knox, CK. 2017. Deposition method, relative humidity, and surface property effects of bacterial spore reaerosolization via pulsed air jet. *Aerosol Sci. Tech.*, 51(4):1027-1034. DOI: 10.1080/02786826.2017.1335389.

Kesavan, J, Schepers, D, Bottiger, J, and Edmonds, J. 2014. UV-C decontamination of aerosolized and surface-bound single spores and bioclusters. *Aerosol Sci. Tech.* 48:450-457. DOI: 10.1080/02786826.2014.889276.

Konečná, B, Kovalčíková, AG, Pančíková, A, Novák, B, Kovalová, E, Celec, P, and Tóthová, L. 2020. "Salivary Extracellular DNA and DNase Activity in Periodontitis." *Appl. Sci.*, 10:7490. doi:10.3390/app10217490.

Kowalski, W. 2009. *Ultraviolet Germicidal Irradiation Handbook: UVGI for Air and Surface Disinfection*. New York: Springer. DOI: 10.1007/978-3-642-01999-9.

Krauter, P, and Biermann, A. 2007. Reaerosolization of fluidized spores in ventilation systems. *Appl. Environ. Microbiol.* 73(7):2165-2172. DOI: 10.1128/AEM.02289-06.

Krishnamoorthy, G and Tandy, BM. 2016. Improving the effectiveness of ultraviolet germicidal irradiation through reflective wall coatings: Experimental and modeling based assessments. *Indoor Built Environ.*, 25:314-328. DOI: 10.1177/1420326X14547785.

Lachowicz-Scroggins, ME, Dunican, EM, Charbit, AR, Raymond, W., Looney, MR, Peters, MC, Gordon, ED, Woodruff, PG, Lefrançois, E, Phillips, BR, et al. 2019. Extracellular DNA, Neutrophil Extracellular Traps, and Inflammasome Activation in Severe Asthma. *Am. J. Respir. Crit. Care Med.* 199(9):1076-1085. DOI: 10.1164/rccm.201810-1869OC.

Lindsley, WG, McClelland, TL, Neu, DT, Martin, SB, Mead, KR, Thewlis, RE, Noti, JD. 2018. Ambulance disinfection using Ultraviolet Germicidal Irradiation (UVGI): Effects of fixture location and surface reflectivity. *J. Occup. Environ. Hyg.* 15(1):1-12 DOI: 10.1080/15459624.2017.1376067.

Landry, ML, Criscuolo, J, and Peaper, DR. 2020. Challenges in use of saliva for detection of SARS CoV-2 RNA in symptomatic outpatients. *J. Clin. Virol.* 130:104567. DOI: 10.1016/j.jcv.2020.104567.

Linssen, RS, Chai, G, Ma, J, Kummarapurugu, AB, van Woensel, JBM, Bem, RA, Kaler, L, Duncan, GA, Zhou, L, Rubin, BK, and Xu, Q. 2021. Neutrophil extracellular traps increase airway mucus viscoelasticity and slow mucus particle transit. *Am. J. Respir. Cell Mol. Biol.* 64(1):69-78. DOI: 10.1165/rcmb.2020-0168OC.

Lu, J, Gu, J, Li, K, Xu, K, Su, W, Lai, Z, Zhou, D, Yu, C, Xu, B, and Yang, Z. 2020. COVID-19 Outbreak Associated with Air Conditioning in Restaurant, Guangzhou, China, 2020. *Emerg. Infect. Dis.* 26(7):1628–1631. DOI: 10.3201/eid2607.200764.

Mackowski, DW. 2008. Exact solution for the scattering and absorption properties of sphere clusters on a plane surface. *J. Quant. Spectrosc. Radiat. Transf.* 109:770-788. DOI: 10.1016/j.jqsrt.2007.08.024.

Mackowski, DW and Mishchenko, MI. 1996. Calculation of the T matrix and the scattering matrix for ensembles of spheres. *J. Opt. Soc. Am. A.* 13(11):2266-2278. DOI: 10.1364/JOSAA.13.002266.

Mackowski, DW and Mishchenko, MI. 2011. A multiple sphere T-matrix Fortran code for use on parallel computer clusters. *J. Quant. Spectrosc. Radiat. Transf.* 112:2182-2192. DOI: 10.1016/j.jqsrt.2011.02.019.

Mackowski, D.W. and Mishchenko, M. I. 2013. Direct simulation of extinction in a slab of spherical particles. *J. Quant. Spectrosc. Radiat. Transf.* 109:770-788. doi.org/10.1016/j.jqsrt.2013.02.008.

Miller, SL, Nazaroff, WW, Jimenez, JL, Boerstra, A, Buonanno, G, Dancer, SJ, Kurnitski, J, Marr, LC, Morawska, L, and Noakes, C. 2020. Transmission of SARS-CoV-2 by inhalation of respiratory aerosol in the Skagit Valley Chorale superspreading event. *Indoor Air*, 00:1-10. DOI: 10.1111/ina.12751.

Morawska, L, Tang, JW, Bahnfleth, W, Bluysen, PM, Boerstra, A, Buonanno, G, Cao, J, Dancer, S, Floto, A, Franchimon, F, et al. 2020. How can airborne transmission of COVID-19 indoors be minimised? *Environ. Internat.* 142:105832. DOI: 10.1016/j.envint.2020.105832

Nardell, EA, and Nathdvitharana, RR. 2020. Airborne spread of SARS-CoV-2 and a potential role for air disinfection. *JAMA*, 324(2):141-142. DOI:10.1001/jama.2020.7603.

Osman, S, Peeters, Z, La Duc, MT, Mancinelli, R, Ehrenfreund, P, and Venkateswaran, K. 2008. Effect of shadowing on survival of bacteria under conditions simulating the Martian atmosphere and UV radiation. *Appl. Environ. Microbiol.* 74(4):959-970. DOI: 10.1128/AEM.01973-07.

Pan, Y, Zhang, D, Yang, P, Poon, LLM, and Wang, Q. 2020. Viral load of SARS-CoV-2 in clinical samples. *Lancet Infect. Dis.* 20:411-412. DOI: 10.1016/S1473-3099(20)30113-4.

Pandit, P, Cooper-White, J, and Punyadeera, C. 2013. High-Yield RNA-Extraction Method for Saliva. *Clin. Chem.* 59(7):1118–1122. DOI: 10.1373/clinchem.2012.197863.

Paton, S, Thompson, K-A, Parks, SR, and Bennett, AM. 2015. Reaerosolization of spores from flooring surfaces to assess the risk of dissemination and transmission of infections. *Appl. Environ. Microbiol.* 81(15):4914-4919. DOI:10.1128/AEM.00412-15.10.1128/AEM.00412-15.

Péré, H, Podglajen, I, Wack, M, Flamarion, E, Mirault, T, Goudot, G, Hauw-Berlemont, C, Le, L, Caudron, E, Carrabin, S, Rodary, J, Ribeyre, T, Bélec, L, and Veyer, D. 2020. Nasal swab

sampling for SARS-CoV-2: a convenient alternative in times of nasopharyngeal swab shortage. *J. Clin. Microbiol.* 58:e00721-20. DOI: 10.1128/JCM.00721-20.

Poehls, UG, Hack, CC, Ekici, AB, Beckmann, MW, Fasching, PA, Ruebner, M, and Huebner, H. 2018. Saliva samples as a source of DNA for high throughput genotyping: an acceptable and sufficient means in improvement of risk estimation throughout mammographic diagnostics. *Eur. J. Med. Res.* 23(20). DOI: 10.1186/s40001-018-0318-9.

Qian, J, Peccia, J, and Ferro, AR. 2014. Walking-induced particle resuspension in indoor environments. *Atmos. Environ.* 89:464-481. DOI: 10.1016/j.atmosenv.2014.02.035.

Ratnesar-Shumate, S, Williams, G, Green, B, et al. 2020. Simulated sunlight rapidly inactivates SARS-CoV-2 on surfaces. *J. Infect. Dis.* 222:214-222 DOI: 10.1093/infdis/jiaa274.

Riis, JL, Bryce, CI, Matin, MJ, Stebbins, JL, Kornienko, O, Huisstede, LV, and Granger, DA. 2018. The validity, stability, and utility of measuring uric acid in saliva. *Biomark. Med.* 12(6): 583-596. DOI: 10.2217/bmm-2017-0336.

Rutala, WA, Gergen, MF, Tande, BM, and Weber, DJ. 2013. Rapid hospital room decontamination using ultraviolet (UV) light with a nanostructured UV-reflective wall coating. *Infect. Cont. Hosp. Ep.* 34:527-529. DOI: 10.1086/67021.

Rutala, WA and Weber, DJ. 2019. Best practices for disinfection of noncritical environmental surfaces and equipment in health care facilities: A bundle approach. *Am. J Infect. Cont. Suppl June.* 47:A96-A105. DOI: 10.1016/j.ajic.2019.01.014.

Ryan, K, McCabe K, Clements, N, Hernandez, M and Miller, SL. 2010. Inactivation of airborne microorganisms using novel ultraviolet radiation sources in reflective flow-through control devices. *Aerosol Sci. Tech.* 44:541-550. DOI: 10.1080/02786821003762411.

Sarkar, A, Xu, F, and Lee, S. 2019. Human saliva and model saliva at bulk to adsorbed phases – similarities and differences. *Adv. Colloid Interface Sci.* 273:102034. DOI: 10.1016/j.cis.2019.102034.

Sagripanti, J-L, and Lytle, CD. 2011. Sensitivity to ultraviolet radiation of Lassa, vaccinia, and Ebola viruses dried on surfaces. *Arch Virol.* 156:489–494. DOI: 10.1007/s00705-010-0847-1.

Schenkels, LCPM, Veerman, ECI, Nieuw Amerongen, AV. 1995. Biochemical Composition of Human Saliva in Relation To Other Mucosal Fluids. *Crit. Rev. Oral Biol. Med.* 6(2):161-175. DOI: 10.1177/10454411950060020501.

Schuit, M., Gardner, S., Wood, S., Bower, K., Williams, G., Freeburger, D., and Dabisch, P. 2020. The influence of simulated sunlight on the inactivation of influenza virus in aerosols. *J. Infect. Dis.* 221:372-378. DOI: 10.1093/infdis/jiz582.

Tang, S, Mao, Y, Jones, RM, Tan, Q, Ji, JS, Li, N, Shen, J, Lv, Y, Pan, L, Ding, P, Wang, X, Wang, Y, MacIntyre, CR, and Shi, X. 2020. Aerosol transmission of SARS-CoV-2? Evidence, prevention and control. *Environ. Int.* 144:106039. DOI: 10.1016/j.envint.2020.106039.



Vejerano, EP, and Marr, LC. 2017. Physico-chemical characteristics of evaporating respiratory fluid droplets. *J. R. Soc. Interface.* 15:0939. DOI: 10.1098/rsif.2017.0939.

Walker, JS, Archer, J, Gregson, FKA, Michel, SES, Bzdek, BR, and Reid, JP. 2021. Accurate Representations of the Microphysical Processes Occurring during the Transport of Exhaled Aerosols and Droplets. *ACS Cent. Sci.* 7:200-209. DOI: 10.1021/acscentsci.0c01522.

Wolfel, R, Corman, VM, Guggemos, W, Seilmaier, M, Zange, S, Muller, MA, Niemeyer, D, Jones, TC, Vollmar, P, Rothe, C, Hoelscher, M, Bleicker, T, Brunink, S, Schneider, J, Ehmann, R, Zwirgmaier, K, Drosten C, and Wendtner, C. 2020. Virological assessment of hospitalized patients with COVID-2019. *Nature*, 581:465-469. DOI: 10.1038/s41586-020-2196-x.

Woo, M-H, Grippin, A, Anwar, D, Smith, T, Wu, C-Y, and Wander, JD. 2012. Effects of relative humidity and spraying medium on UV decontamination of filters loaded with viral aerosols. *Appl. Environ. Microbiol.* 78(16):5781-5787. DOI: 10.1128/AEM.00465-12.

Wyllie, AL, Fournier, J, Casanovas-Massana, A, et al. 2020. Saliva or nasopharyngeal swab specimens for detection of SARS-CoV-2. *N. Engl. J. Med.* 383:1283-1286. DOI: 10.1056/NEJMc2016359

Yilmaz, A, Marklund, E, Andersson, M, Nilsson, S, Andersson, L-M, Lindh, M, and Gisslen, M. 2021. Upper respiratory tract levels of severe acute respiratory syndrome coronavirus 2 RNA and duration of viral RNA shedding do not differ between patients with mild and severe/critical coronavirus disease 2019. *J. Infect. Dis.* 223:15-18. DOI: 10.1093/infdis/jiaa632.

Yousefi, S, Simon, D, Stojkov, D, Karsonova, A, Karaulov, A, and Simon, H.-U. 2020. In vivo evidence for extracellular DNA trap formation. *Cell Death Dis.* 11:300. DOI: 10.1038/s41419-020-2497-x.

Zou, L, Ruan, F, Huang, M, et al. 2020. SARS-CoV-2 viral load in upper respiratory specimens of infected patients. *N. Engl. J. Med.* 382:12. DOI: 10.1056/NEJMc2001737.

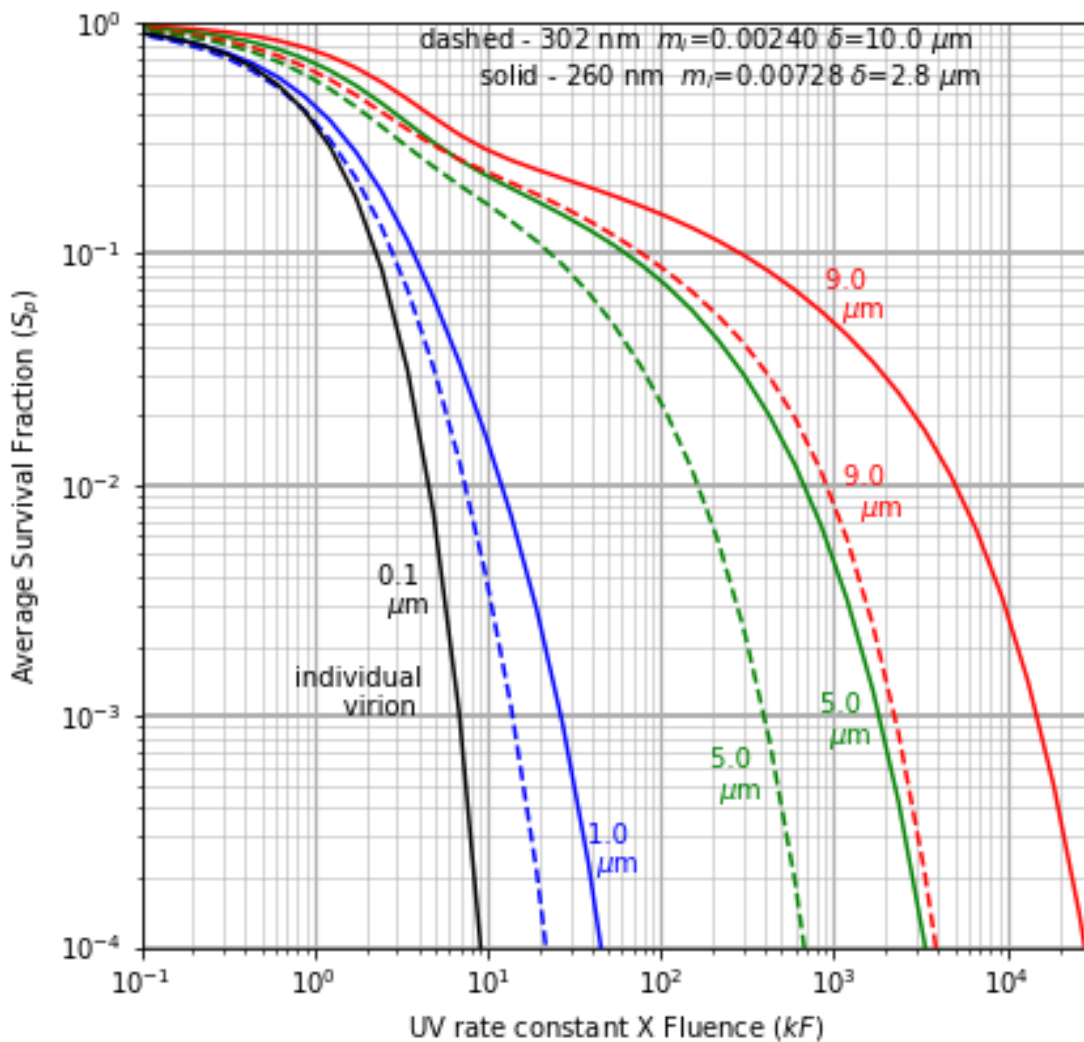

Figure 1. Average survival fractions ( $S_p$ ) vs  $kF$ , the product of the UV rate constant ( $k$ ) and the fluence ( $F$ ) for 100 nm virions within spherical particles of dried respiratory fluids with the diameters indicated (9  $\mu\text{m}$ , red; 5  $\mu\text{m}$ , green; 1  $\mu\text{m}$ , blue; 0.1  $\mu\text{m}$ , black). The  $S_p$  at 260 nm are solid lines, and at 302 nm are dashed lines. Typically the  $k$  at 302 nm is less than the  $k$  at 260 nm. The particles are resting on a surface with real refractive index 1.4. The illuminating UV light propagates toward the surface in a direction perpendicular to the surface.

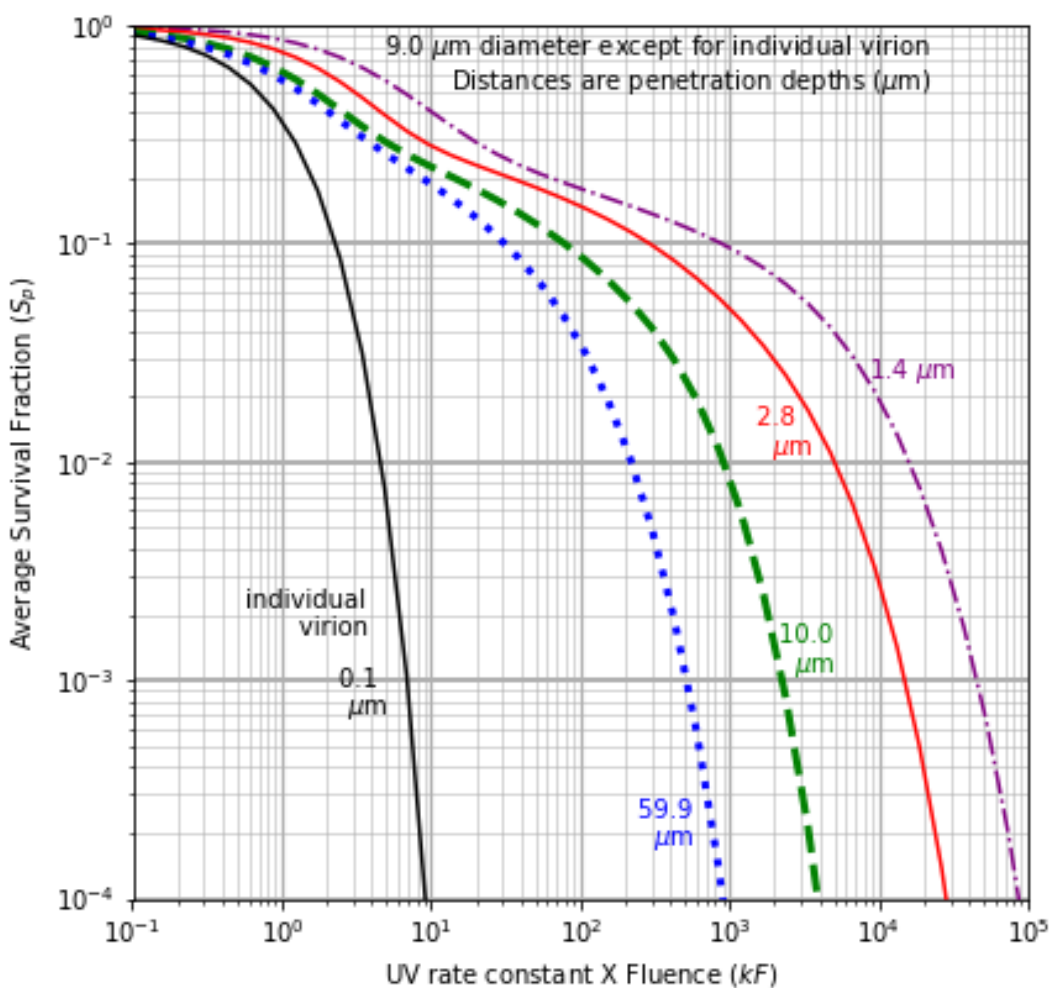

Figure 2.  $S_p$  vs  $kF$  for 9- $\mu\text{m}$  particles (as in Fig. 1), except that each curve has a different penetration depth and  $m_i$  for its the dried respiratory fluids: 1.4  $\mu\text{m}$  ( $m_i = 0.01456$ ) at 260 nm (purple); 2.8  $\mu\text{m}$  ( $m_i = 0.00728$ ) at 260 nm (red); 10  $\mu\text{m}$  ( $m_i = 0.00241$ ) for a typical estimate at 302 nm (green); and, 59.9  $\mu\text{m}$  ( $m_i = 0.00040$ ) for a more weakly absorbing particle at 302 nm (blue). The particle size is 9  $\mu\text{m}$  except for the 0.1  $\mu\text{m}$  individual virion shown for comparison.

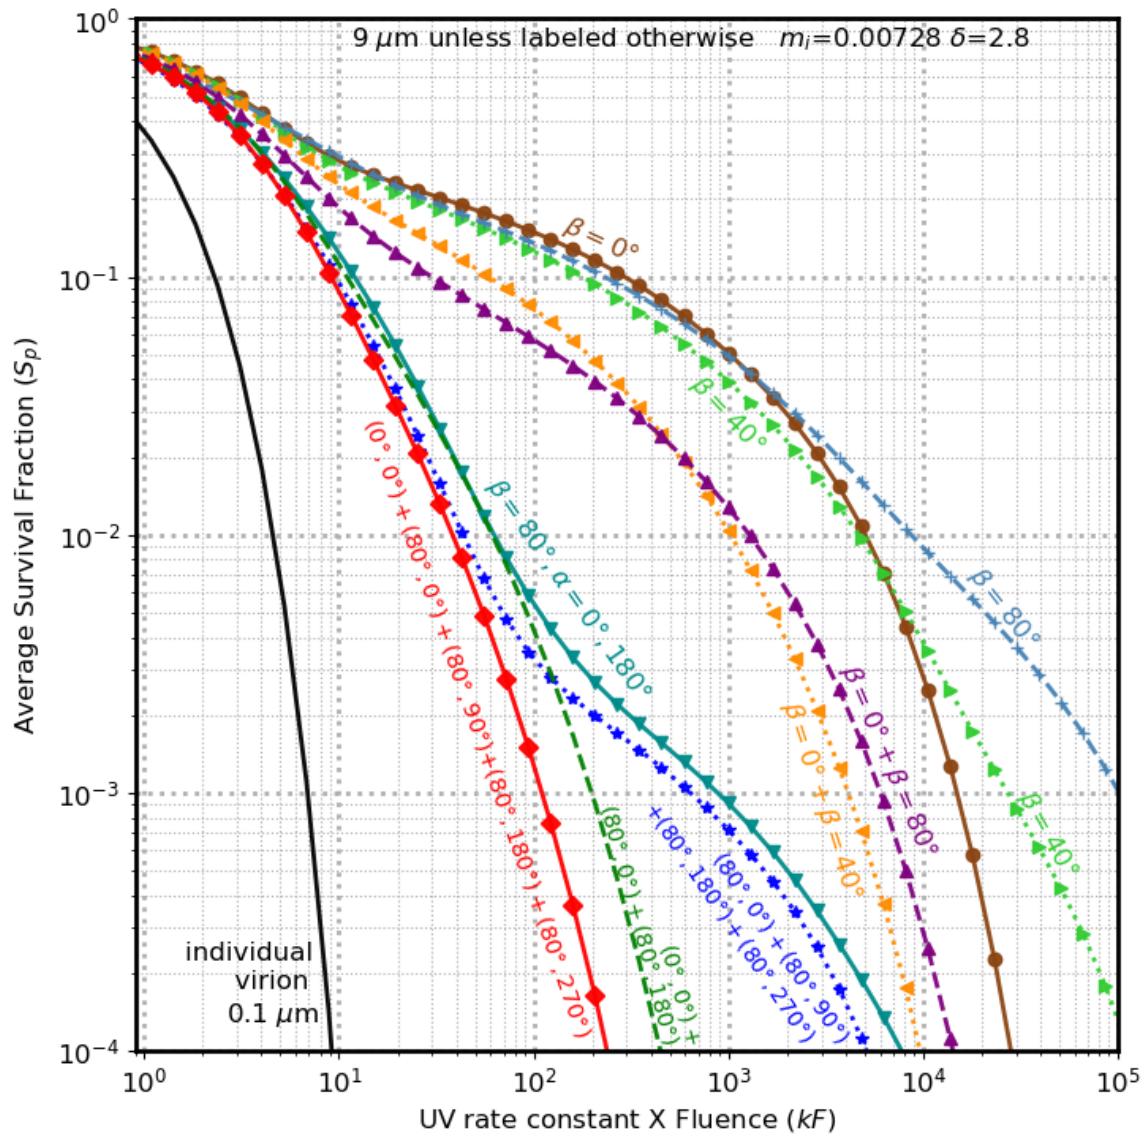

Figure 3.  $S_p$  vs  $kF$ , for 9- $\mu\text{m}$  particles as in Fig. 1 (case with 260 nm illumination and  $\delta = 2.8$   $\mu\text{m}$ ), but with various combination of illumination beams. The three curves on the far right are each for a single illumination angle  $\beta$ :  $0^\circ$  (solid, brown circles);  $40^\circ$  (light green, dots and triangles); and  $80^\circ$  (steel blue, dashed). The next two lines have an illumination wave normal to the surface ( $\beta=0^\circ$ ) and a second wave at  $\beta=40^\circ$  (purple), or  $80^\circ$  (dark yellow, dots, triangles). In each case, the total intensity illuminating the particle is the same.

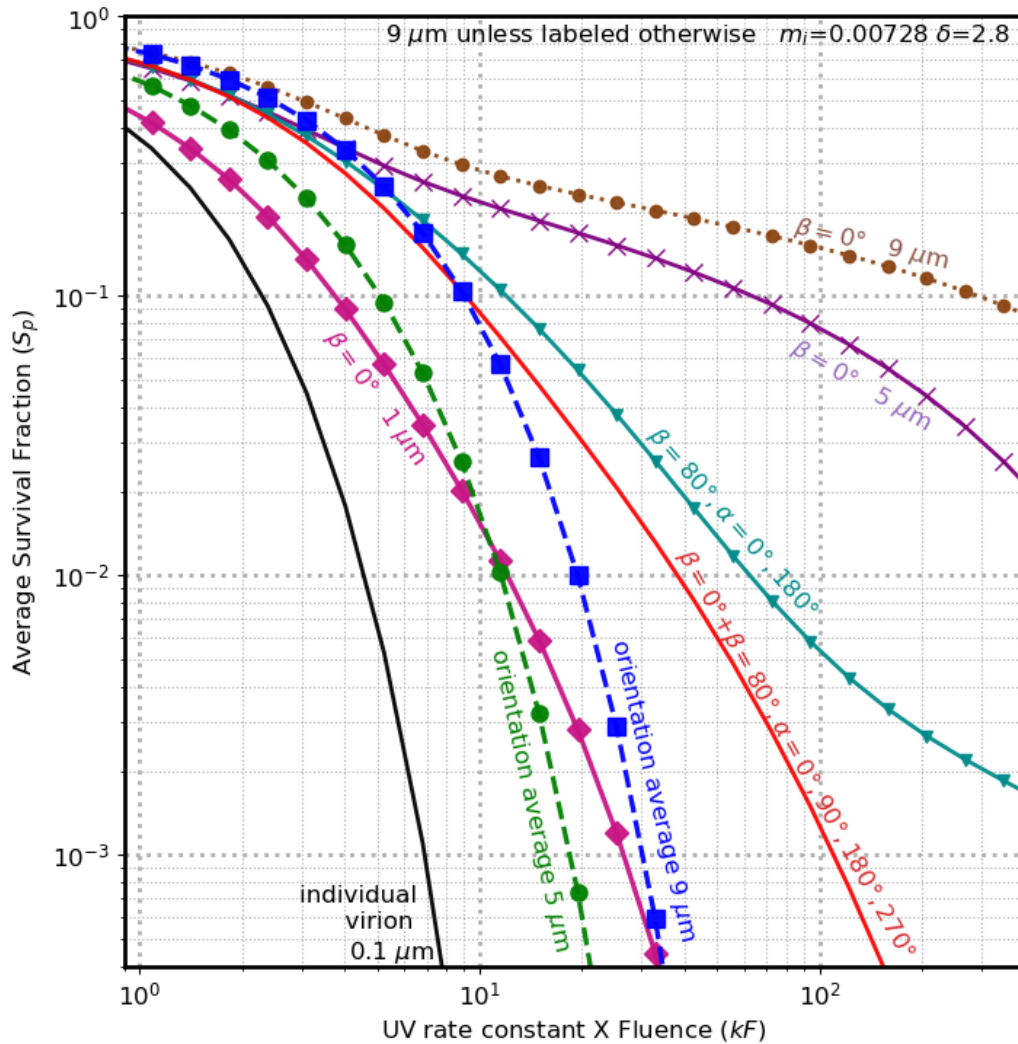

Figure 4.  $S_p$  vs  $kF$  for virions in particles as in Fig. 3 with 260-nm light, but the dashed lines are for particles illuminated with equal intensity from all directions (i.e., averaged over all orientations) with diameters ( $d$ ) = 5  $\mu\text{m}$  (green) and 9  $\mu\text{m}$  (blue). Other cases are shown for particles illuminated with a wave propagating normal to the surface ( $\beta=0^\circ$ ): individual virions (black);  $d = 1\text{-}\mu\text{m}$  (magenta diamonds),  $d = 5\text{-}\mu\text{m}$  (purple  $\times$ ), and  $d = 9\text{-}\mu\text{m}$  (brown circles with dotted line). Also shown from Fig. 3: five-beam case (solid red) and two beams with  $\beta = 80^\circ$  (cyan with triangles).



Table 1: Survival fraction of virions ( $S_p$ ) at several  $kF$ . Parameters include: wavelength ( $\lambda$ ) in nm, diameter ( $d$ ) of the large particle in  $\mu\text{m}$ , numbers of virions ( $N$ ) in calculations, and  $m_i$  (imaginary component of complex refractive index). Incident angle(s) of UV illumination are specified by a zenith angle ( $\beta$ , in degrees), and, when needed, the azimuthal angle ( $\alpha$ ). “All” indicates averaged over all orientations. The individual virion ( $d=0.1 \mu\text{m}$ ) is plotted in all figures, but only appears once in this table (top row).

| Fig | $\lambda$<br>nm | $d$<br>$\mu\text{m}$ | $N$   | $m_i$   | angle<br>degrees                                     | $S_p$ @<br>kF=1 | $S_p$ @<br>kF=10 | $S_p$ @<br>kF=100 | $S_p$ @<br>kF=1000 | $S_p$ @ kF=<br>10000 |
|-----|-----------------|----------------------|-------|---------|------------------------------------------------------|-----------------|------------------|-------------------|--------------------|----------------------|
| 1   | 260             | 0.1                  | 1     | 0.00728 | $\beta=0$                                            | 0.368           | 0.000045         | 0.000000          | 0.000000           | 0.000000             |
| 1   | 260             | 1                    | 500   | 0.00728 | $\beta=0$                                            | 0.442           | 0.015551         | 0.000000          | 0.000000           | 0.000000             |
| 1   | 260             | 5                    | 3000  | 0.00728 | $\beta=0$                                            | 0.671           | 0.217234         | 0.076803          | 0.004748           | 0.000000             |
| 1   | 260             | 9                    | 12000 | 0.00728 | $\beta=0$                                            | 0.759           | 0.281645         | 0.148994          | 0.050528           | 0.002829             |
| 1   | 302             | 1                    | 500   | 0.00241 | $\beta=0$                                            | 0.377           | 0.003765         | 0.000000          | 0.000000           | 0.000000             |
| 1   | 302             | 5                    | 3000  | 0.00241 | $\beta=0$                                            | 0.569           | 0.163955         | 0.022992          | 0.000010           | 0.000000             |
| 1   | 302             | 9                    | 12000 | 0.00241 | $\beta=0$                                            | 0.617           | 0.225805         | 0.087981          | 0.008403           | 0.000000             |
| 2   | 302             | 9                    | 12000 | 0.0004  | $\beta=0$                                            | 0.565           | 0.188023         | 0.034816          | 0.000059           | 0.000000             |
| 2   | 302             | 9                    | 12000 | 0.00241 | $\beta=0$                                            | 0.617           | 0.225805         | 0.087981          | 0.008403           | 0.000000             |
| 2   | 260             | 9                    | 12000 | 0.00728 | $\beta=0$                                            | 0.759           | 0.281645         | 0.148994          | 0.050528           | 0.002829             |
| 2   | 260             | 9                    | 12000 | 0.01456 | $\beta=0$                                            | 0.861           | 0.404283         | 0.179325          | 0.096010           | 0.019449             |
| 3   | 260             | 9                    | 12000 | 0.00728 | $\beta=0$                                            | 0.759           | 0.281645         | 0.148994          | 0.050528           | 0.002829             |
| 3   | 260             | 9                    | 12000 | 0.00728 | $\beta= 40$                                          | 0.751           | 0.227918         | 0.075299          | 0.010311           | 0.000088             |
| 3   | 260             | 9                    | 12000 | 0.00728 | $\beta= 80$                                          | 0.718           | 0.185450         | 0.056947          | 0.012725           | 0.000289             |
| 3   | 260             | 9                    | 12000 | 0.00728 | $\beta= 0,40$                                        | 0.754           | 0.239888         | 0.083816          | 0.011816           | 0.000162             |
| 3   | 260             | 9                    | 12000 | 0.00728 | $\beta= 0,80$                                        | 0.734           | 0.195602         | 0.061411          | 0.013317           | 0.000342             |
| 3   | 260             | 9                    | 12000 | 0.00728 | $\beta= 80,$<br>$\alpha = 0,180$                     | 0.683           | 0.123693         | 0.005391          | 0.000908           | 0.000067             |
| 3   | 260             | 9                    | 12000 | 0.00728 | $\beta= 80,$<br>$\alpha=0,90,180,270$                | 0.675           | 0.095058         | 0.003309          | 0.000716           | 0.000021             |
| 3   | 260             | 9                    | 12000 | 0.00728 | $\beta=0 +$<br>$\beta= 80, \alpha= 0,180$            | 0.699           | 0.111898         | 0.004289          | 0.000004           | 0.000000             |
| 3   | 260             | 9                    | 12000 | 0.00728 | $\beta=0 +$<br>$\beta= 80,$<br>$\alpha=0,90,180,270$ | 0.686           | 0.087636         | 0.001282          | 0.000000           | 0.000000             |
| 4   | 260             | 5                    | 3000  | 0.00728 | All                                                  | 0.589           | 0.017202         | 0.000000          | 0.000000           | 0.000000             |
| 4   | 260             | 9                    | 4000  | 0.00728 | All                                                  | 0.751           | 0.080112         | 0.000000          | 0.000000           | 0.000000             |
